# Supplementary material for: Robust dose‐painting‐by‐numbers vs. nonselective dose escalation for non‐small cell lung cancer patients
Source: PubMed Central journal article supplement (PMC8411426; doi:10.1002/mp.14840), 2021-05-14

**Figure S1**

Axial, Coronal, and sagittal FDG-PET-CT images through the center of the CTV for all 12 patients

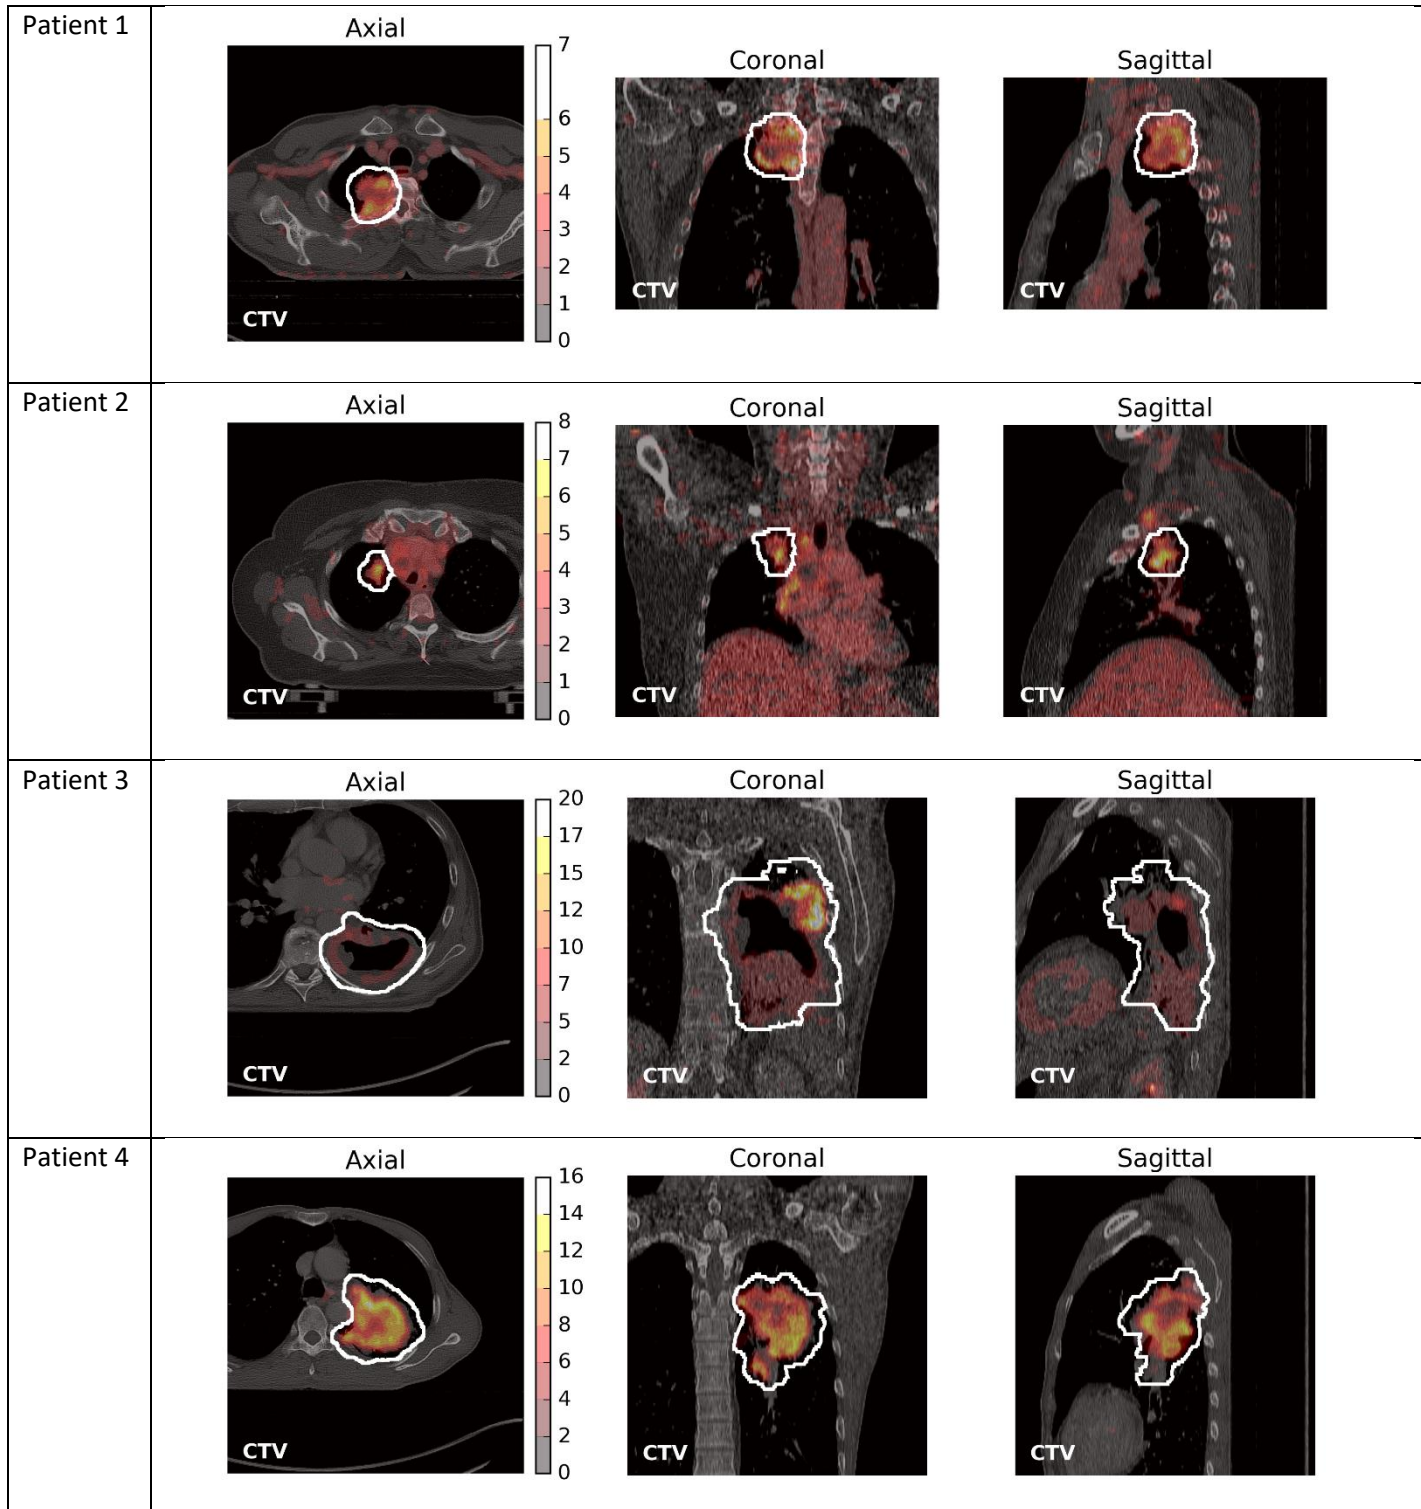

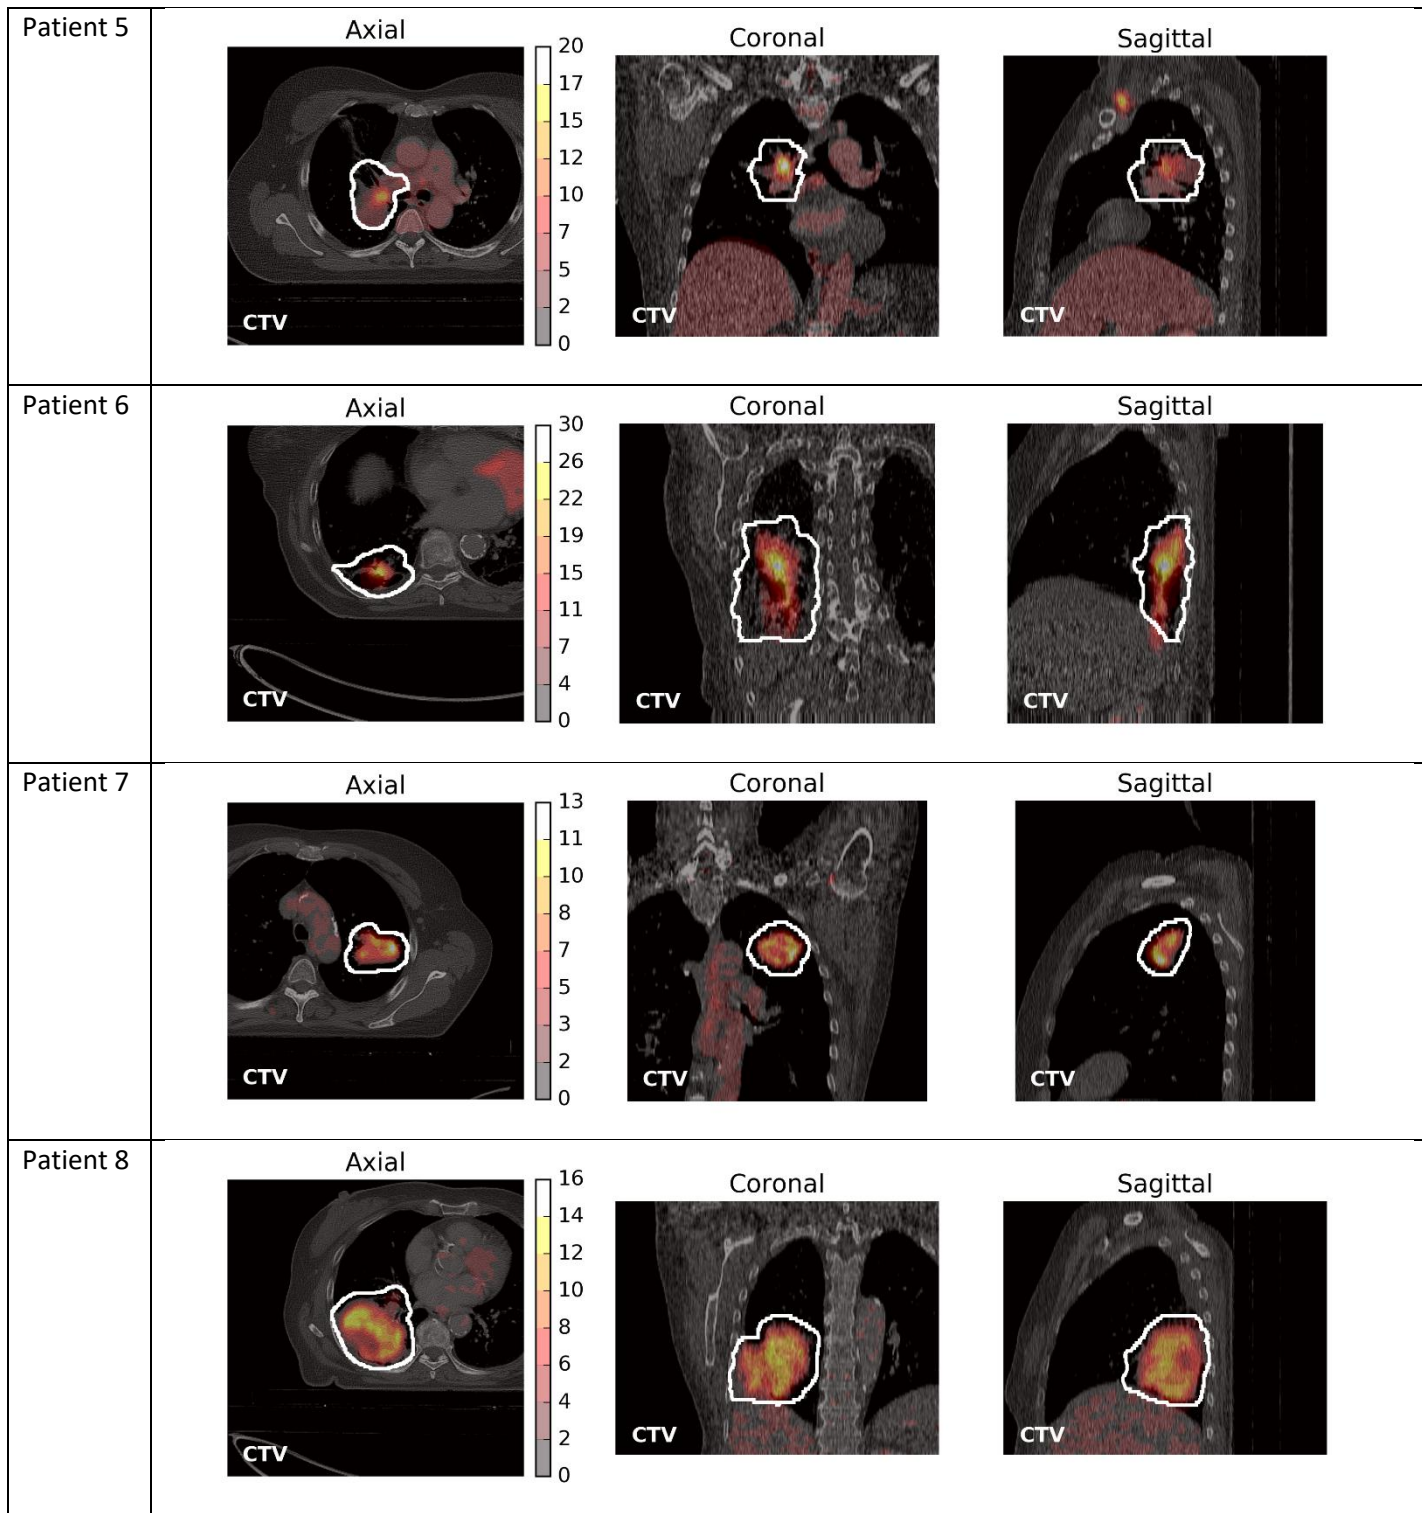

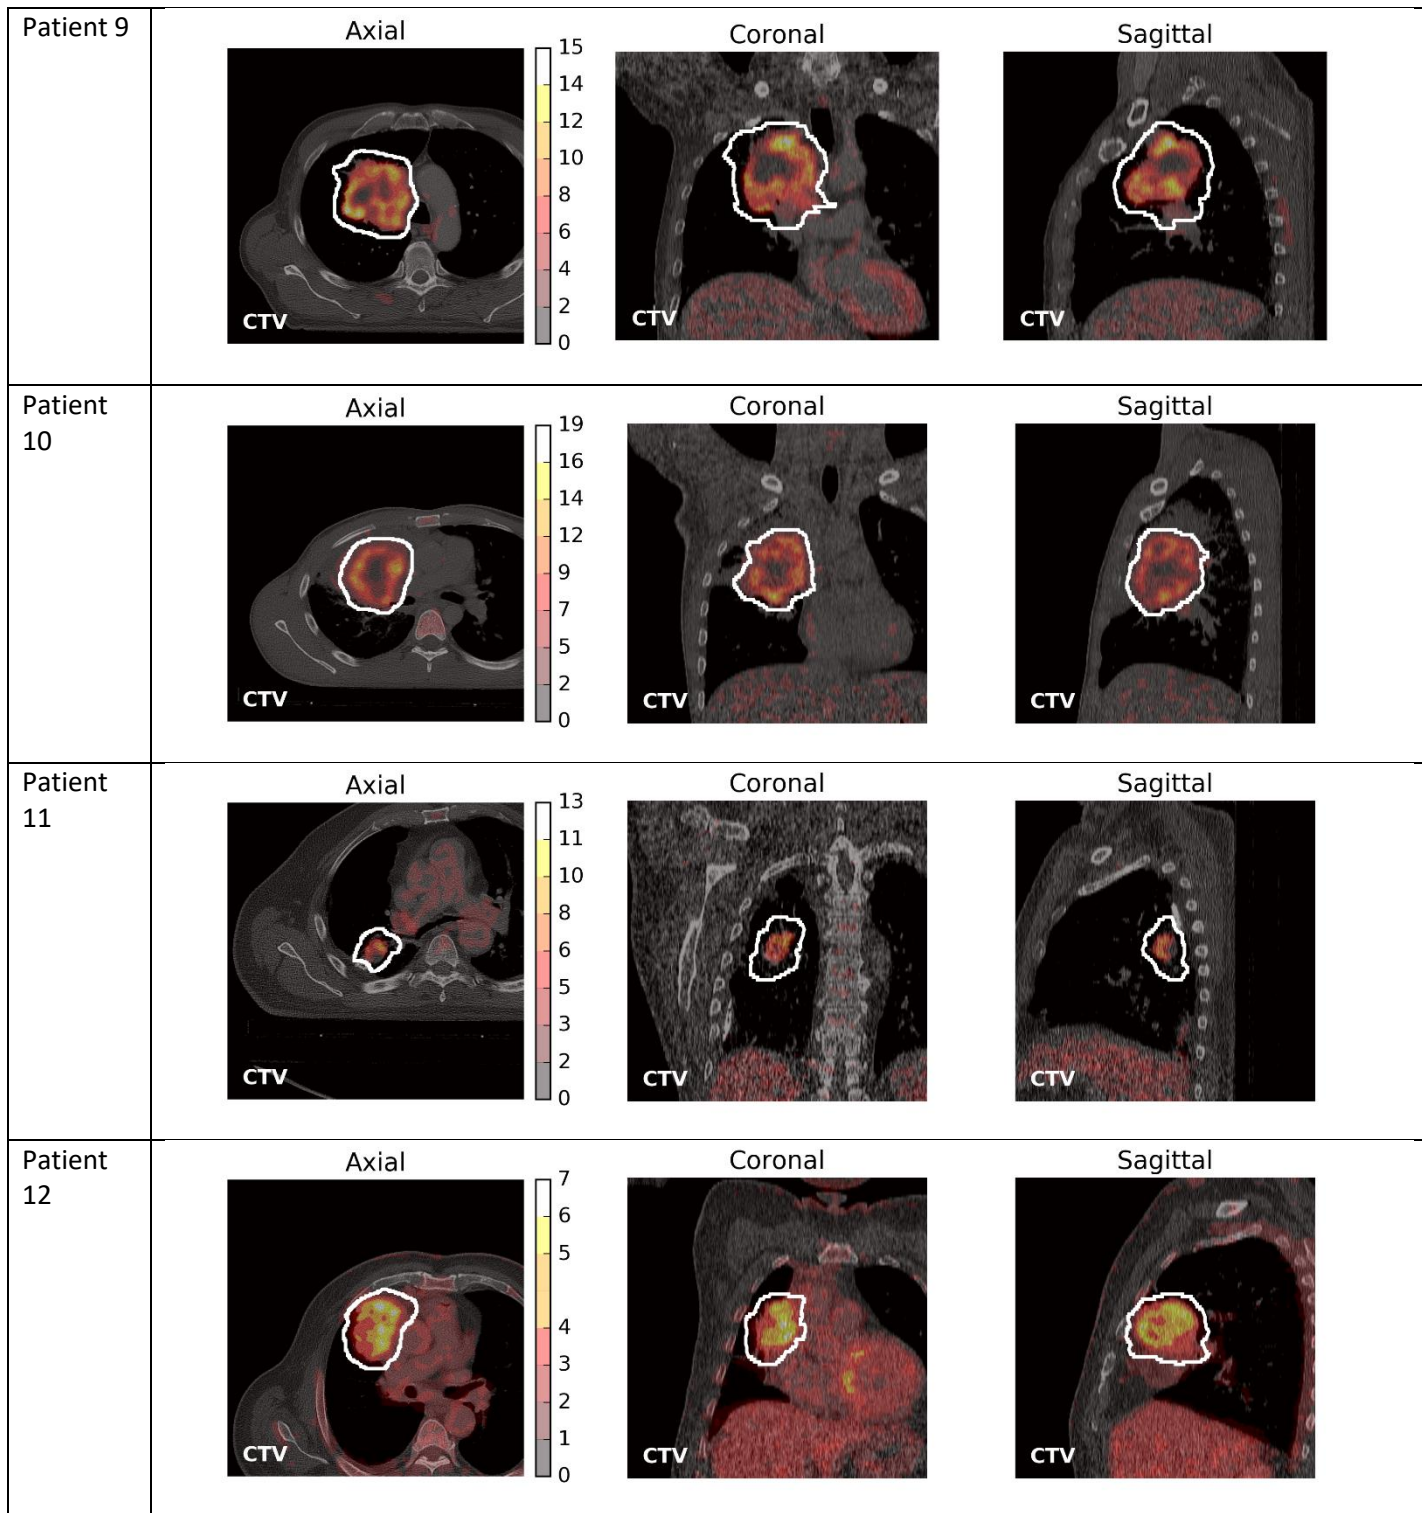



**Figure S2**

TCP values of the dose-painting by numbers plans (DPBN), non-selective dose escalation plans (NSDE) and the 60 Gy reference dose distributions for all 12 patients as function of the theoretical gain of DPBN. The different rows represent steep, moderate and shallow TCP relations (expressed by the differences between TD80 and TD50,  $\Delta TD_{80-50}$ ) and the columns, sensitive, moderate and resistant tumors (expressed by TD50). The thick black lines represent the averages over the 12 patients. For the most radio-resistant tumors (TD50 = 100 Gy) the TCP of the reference dose distribution was around 0, though still substantial for NSDE and DPBN

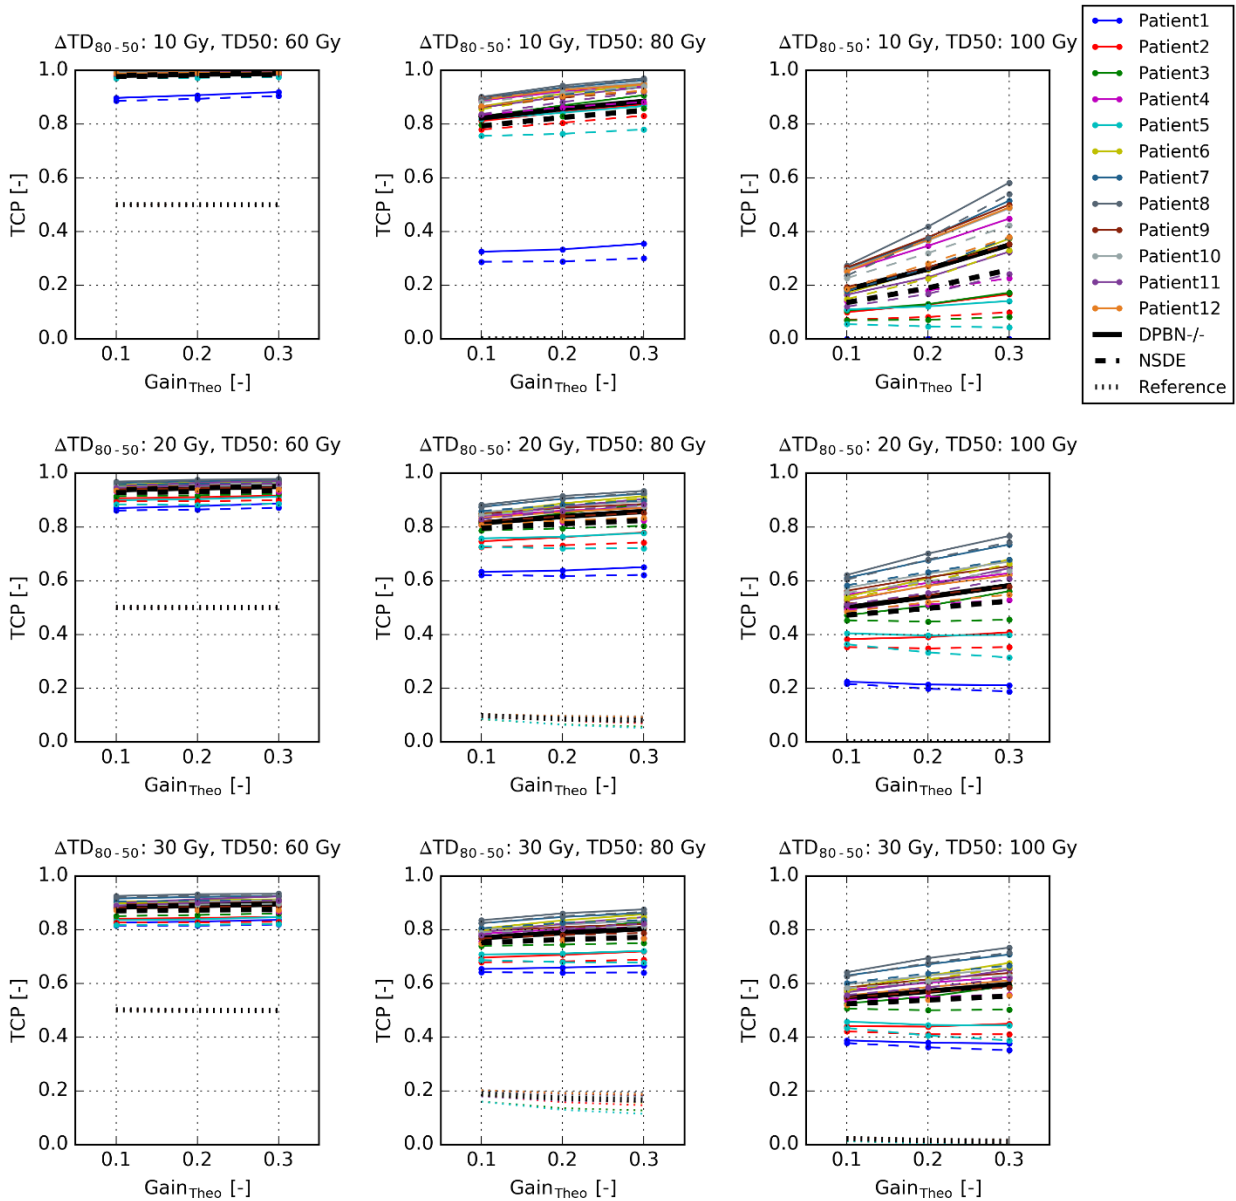

Supplement: MP-48-3096-s001.pdf [file MP-48-3096-s001.pdf]
